1 **The glycan alphabet is not universal: a hypothesis**

2

3 Jaya Srivastava (ORCID: 0000-0002-1657-4004)<sup>1\*</sup>, P. Sunthar<sup>2</sup> and Petety V. Balaji  
4 (ORCID: 0000-0002-6018-6957)<sup>1</sup>

5

6 <sup>1</sup>Department of Biosciences and Bioengineering, Indian Institute of Technology  
7 Bombay, Powai, Mumbai 400076, India

8 <sup>2</sup>Department of Chemical Engineering, Indian Institute of Technology Bombay,  
9 Powai, Mumbai 400076, India

10

11 \*Corresponding author

12 Email: [jaya\\_srivastava@iitb.ac.in](mailto:jaya_srivastava@iitb.ac.in)

13

14 Keywords: Glycobiology, bioinformatics, data mining

15 **Abstract**

16 Several monosaccharides constitute naturally occurring glycans but it is uncertain  
17 if they constitute a universal set like the alphabets of proteins and DNA. Based on  
18 the available experimental observations, it is hypothesized herein that the glycan  
19 alphabet is not universal. Data on the presence / absence of pathways for the  
20 biosynthesis of 55 monosaccharides in 12939 completely sequenced archaeal and  
21 bacterial genomes are presented in support of this hypothesis. Pathways were  
22 identified by searching for homologs of biosynthesis pathway enzymes. Substantial  
23 variations are observed in the set of monosaccharides used by organisms belonging  
24 to the same phylum, genera and even species. Monosaccharides are grouped as  
25 Common, Less Common and Rare based on their prevalence in Archaea and  
26 Bacteria. It is observed that fewer enzymes suffice to biosynthesize the Common  
27 group. It appears that the Common group originated before the formation of three  
28 domains of life. In contrast, the Rare group are confined to a few species in a few  
29 phyla, suggesting that they evolved much later. Fold conservation, as observed in  
30 aminotransferases and SDR superfamily members involved in monosaccharide  
31 biosynthesis, suggests neo- and sub-functionalization of genes leading to the  
32 formation of Rare group monosaccharides. Non-universality of the glycan alphabet  
33 begets questions about the role of different monosaccharides in determining an  
34 organism's fitness.

## 35 **Impact statement**

36 Carbohydrates, nucleic acids and proteins are important classes of biological  
37 macromolecules. The universality of DNA, RNA and protein alphabets has been  
38 established beyond doubt. However, the universality of glycan alphabet is  
39 unknown primarily because of the challenges associated with the elucidation of  
40 glycan structures. This has precluded a comprehensive investigation of glycan  
41 alphabet. To address this challenge, we have identified the prevalence of 55  
42 monosaccharide biosynthesis pathways in 12939 completely sequenced archaeal  
43 and bacterial genomes by searching for homologs of biosynthesis pathway  
44 enzymes using HMM profiles, and in a few cases, BLASTp. This revealed that the  
45 glycan alphabet is highly variable; in fact, significant differences are found even  
46 among different strains of a species. Possible implications of this variability may  
47 be significant in understanding the evolution of Archaea and Bacteria in diverse  
48 and competitive environments. Factors that drive the choice of monosaccharides  
49 used by an organism need to be investigated, and will be of interest in  
50 understanding host-pathogen interactions. Additionally, the knowledge of glycan  
51 alphabet can be employed for structural characterization / validation of glycans  
52 inferred using mass spectrometry. Knowledge of unique monosaccharides and  
53 biosynthetic enzymes can also be used as novel drug targets against human  
54 pathogens.

55

## 56 **Data summary**

57 The curated set of proteins used in this study, with domain assignment, is listed in  
58 supplementary\_data.xlsx. Corresponding 396 references with evidence of  
59 experimental characterization are included in supplementary material. Results of  
60 genome scan which include predictions of monosaccharides as well as the  
61 biosynthesis pathway enzymes is available at  
62 <http://www.bio.iitb.ac.in/glycopathdb/> including the aforementioned information.  
63 Python script used to scan genomes to search for monosaccharide biosynthesis  
64 pathways are available on request.

## 65 **Introduction**

66 Living organisms show enormous diversity in organization, size, morphology,  
67 habitat, etc., but are unified by the highly conserved processes of central dogma:  
68 replication, transcription and translation. The enormous diversity seen in life forms  
69 is encoded by DNA and decoded primarily by proteins. Both DNA and proteins  
70 use the same set of building blocks (nucleotide bases and amino acids,  
71 respectively) in all organisms; yet, they store the requisite information by merely  
72 varying the (i) set/subset of building blocks used, (ii) number of times each  
73 building block is used and (iii) sequence in which the building blocks are linked  
74 [collectively referred to as the ‘sequence’ (Table 1)]. The information required for  
75 several other biological processes are stored by glycans, the third group of  
76 biological macromolecules (1). It has been found that glycans evolve rapidly in  
77 response to changing environmental conditions, especially in Bacteria, and thus  
78 contribute to organismal diversity (2,3). The question is, do glycans use the same  
79 set of building blocks (viz., monosaccharides) in all organisms, the way proteins  
80 and nucleic acids do?

81  
82 Monosaccharides show a lot more structural variation than amino acids in terms of  
83 the enantiomeric forms (both D and L), size (5 to 9 carbon atoms), ring type  
84 (pyranose, furanose), and type and extent of modification (deoxy, amino, N-  
85 formyl, N-acetyl, etc.). Some pairs of monosaccharides differ from each other  
86 merely in the configuration of carbon atoms. The sequence [as defined above] of  
87 monosaccharides brings about diversity even in the primary structure of glycans.  
88 DNA and protein are linear polymers and the linkage type that connects monomers  
89 remains the same throughout. In contrast, glycans can be branched and have  
90 alternative isomeric linkages (e.g.,  $\alpha 1 \rightarrow 3$ ,  $\beta 1 \rightarrow 4$ ,  $\alpha 2 \rightarrow 6$  and so on) (4), two  
91 features that enhance diversity in glycans. Repeat length heterogeneity (the number  
92 of occurrences of a sequence repeat) is observed in glycans (5,6), as well as DNA  
93 and proteins, although there are no data on the frequency of occurrence of this  
94 feature in these three classes of biomolecules. An additional factor that contributes  
95 to the diversity in the primary structure of glycans is microheterogeneity (7), a  
96 feature not seen in DNA or proteins (Table 1). These structural variations demand  
97 the use of multiple analytical techniques for sequencing and hence there are no

98 automated methods for sequencing glycans. Biosynthesis of DNA and proteins is  
 99 template-driven but not that of glycans. Consequently, there is no equivalent of  
 100 polymerase chain reaction or recombinant protein expression to ‘amplify’ glycans  
 101 to obtain samples in amounts required for structural / functional analysis. These  
 102 constraints have largely limited data on glycan sequences.

103

104 **Table 1 Sources of diversity in primary structures of DNA, proteins and glycans**

| Feature                                        | DNA                                                                                                                                                  | Protein                                                                                                                                                                                                                            | Glycan                                                                                                                                                                                                                                                                                                        |
|------------------------------------------------|------------------------------------------------------------------------------------------------------------------------------------------------------|------------------------------------------------------------------------------------------------------------------------------------------------------------------------------------------------------------------------------------|---------------------------------------------------------------------------------------------------------------------------------------------------------------------------------------------------------------------------------------------------------------------------------------------------------------|
| <i>Structural diversity of building blocks</i> | (i) Low (four nucleotides).<br>(ii) Nucleotide modifications (known but rare): N7-methylation of Ade/Gua                                             | (i) Higher, relative to DNA (20 amino acids). Has structurally similar pairs: Asp/Glu, Asn/Gln, Phe/Tyr, Leu/Ile/Val.<br>(ii) Amino acid modifications (known but rare): hydroxylation of Pro and Lys, selenocysteine, pyrrolysine | (i) Highest. Several pentoses and hexoses, many of which are configurational isomers.<br>(ii) Pyranose and furanose forms (e.g., Gal).<br>(iii) Both enantiomeric forms (e.g., Gal).<br>(iv) Modifications extremely common (deoxy, uronic acid, deoxyamino and its derivatives, acetylation, sulfation, ...) |
| <i>Linkage</i>                                 | 3',5'-phosphodiester. 5',5'-phosphodiester occurs but very rare                                                                                      | Amide bond. $\gamma$ -COOH of Glu and $\epsilon$ -NH <sub>2</sub> group of Lys used but very rare                                                                                                                                  | Alternative isomeric linkages are very common ( $\alpha$ 1 $\rightarrow$ 3, $\beta$ 1 $\rightarrow$ 3, $\alpha$ 1 $\rightarrow$ 6, $\beta$ 1 $\rightarrow$ 4, $\alpha$ 2 $\rightarrow$ 3, $\alpha$ 2 $\rightarrow$ 6 and so on)                                                                               |
| <i>Sequence</i>                                | (i) Set/subset of building blocks used<br>(ii) Number of times each building block is used<br>(iii) Sequence in which the building blocks are linked |                                                                                                                                                                                                                                    |                                                                                                                                                                                                                                                                                                               |
| <i>Branching</i>                               | Absent                                                                                                                                               | Absent                                                                                                                                                                                                                             | Quite common                                                                                                                                                                                                                                                                                                  |
| <i>Sequence repeat heterogeneity</i>           | Present                                                                                                                                              | Present                                                                                                                                                                                                                            | Present                                                                                                                                                                                                                                                                                                       |
| <i>Microheterogeneity</i> <sup>1</sup>         | Absent                                                                                                                                               | Absent                                                                                                                                                                                                                             | Present                                                                                                                                                                                                                                                                                                       |

105 <sup>1</sup>Microheterogeneity refers to the presence of multiple forms of glycans (minor but distinct variations)  
 106 present in different molecules of a protein synthesized by a cell at the ‘same’ time. This feature is unique  
 107 to glycans just as the presence of splice variants is unique to proteins.

108

109 Monosaccharides are viewed as the third alphabet of life (8). How large is this  
110 alphabet? The number of monosaccharides used collectively by living systems is at  
111 least 60. An analysis of the bacterial glycan structural data showed a distinct  
112 difference in the set of monosaccharides used by bacteria and mammals (9). Is this  
113 difference evidence of absence i.e., monosaccharides found in databases are true  
114 representations of monosaccharides used by these organisms, and those not found  
115 are not used by organisms? Or, is it just absence of evidence i.e., the glycan  
116 alphabet is indeed universal and the observed differences are merely due to  
117 inadequate sequencing? With the availability of the whole genome sequence of a  
118 large number of organisms, it has now become possible to resolve this issue.

119  
120 In this study, it is hypothesized that the glycan alphabet is NOT universal, i.e.,  
121 different organisms use different sets of monosaccharides. This is in contrast to  
122 those of DNA, RNA and proteins. This hypothesis is put forward based on the  
123 observations that >60 monosaccharides are found in living systems; the database of  
124 glycan structures shows differential usage of monosaccharides and that several  
125 serotypes differ from each other in the monosaccharides they use. Results obtained  
126 by mining whole genome sequences of 303 Archaea and 12636 Bacteria are  
127 presented herein in support of this hypothesis. Monosaccharides considered in this  
128 study are nucleotide activated moieties which are utilized by glycosyltransferases  
129 (GTs) in the biosynthesis of glycans. Subsequent to such a GT-catalysed transfer,  
130 monosaccharides may be modified (e.g., O-acetylation). Monosaccharide  
131 derivatives so obtained are not considered in the present study. Enzymes catalysing  
132 one or more steps of the biosynthesis pathway are not characterized experimentally  
133 for some of the monosaccharides. Such monosaccharides were not considered in  
134 this study.

135

## 136 **Methods**

137 **Databases and software:** Protein sequences and 3D structures were obtained from  
138 UniProt and PDB (Table S1). Completely sequenced genomes of 303 Archaea and  
139 12636 Bacteria were obtained from the NCBI RefSeq database. These genomes are  
140 spread across 3384 species belonging to 1194 genera (Figure S1). Gene  
141 neighborhood was analyzed using feature tables taken from NCBI for the  
142 respective genomes. BLASTp, MUSCLE, HMMER and CD-Hit (Table S1) were

143 installed and used locally. Default values were used for all parameters except when  
144 stated otherwise. Word size was set to 2 for BLASTp to prioritize global  
145 alignments over local alignments. Thresholds for Hidden Markov Model (HMM)  
146 profiles were set based on the best 1 domain bit score rather than e-values since the  
147 former is independent of database size.

148 **Searching genomes for monosaccharide biosynthesis pathways:** Pathways for  
149 the biosynthesis of 55 monosaccharides have been elucidated to date (Table 2,  
150 Figure S2). HMM profiles were generated using carefully curated sets of homologs  
151 for 57 families of enzymes that catalyze various steps of 55 monosaccharides  
152 (Supplementary\_data.xlsx:Worksheet1). Sequences were used directly as BLASTp  
153 queries when the number of enzymes characterized experimentally is not sufficient  
154 for a HMM profile (Supplementary\_data.xlsx:Worksheet2). In-house python  
155 scripts were used to scan genomes to identify homologs. Presence of a homolog for  
156 each and every enzyme of the biosynthetic pathway of a monosaccharide is taken  
157 as evidence of the utilization of this monosaccharide by the organism. On the other  
158 hand, absence of a homolog for even one enzyme of the pathway is interpreted as  
159 the absence of the corresponding monosaccharide from the organism's glycan  
160 alphabet.

161 **Choice of precursors:** Glucose-1-phosphate, fructofuranose-6-phosphate and  
162 sedoheptulose-7-phosphate are precursors for many of the monosaccharides  
163 (Supplementary\_data.xlsx:Worksheet6). Fructofuranose-6-phosphate and  
164 sedoheptulose-7-phosphate are intermediates in the glycolytic pathways viz.,  
165 Embden-Meyerhof pathway and pentose phosphate pathway, respectively, and  
166 these enzymes are not considered for the search. Pathways for biosynthesis of  
167 UDP-Glc2NAc and GDP-mannose have been considered separately since  
168 Glc2NAc and mannose are glycan building blocks as well as intermediates in the  
169 biosynthesis of several other monosaccharides. Hence biosynthesis steps of UDP-  
170 Glc2NAc and GDP-mannose were excluded from those of their derivatives. An  
171 additional pathway for UDP-glucose biosynthesis was considered to analyze its  
172 ubiquity since UDP-glucose is part of both anabolic and catabolic pathways. The  
173 biosynthesis of CMP-Leg5Ac7Ac starting from N-acetyl-glucosamine-1-phosphate



174 has also been considered because of the uncommon guanylyltransferase in the first  
175 step of the pathway.

176 **Table 2 Summary of the pathways for the biosynthesis of monosaccharides<sup>a,b</sup>**

| Details about the end product of biosynthesis pathways                   | Precursor <sup>c</sup> |                       |         |             |             |         |
|--------------------------------------------------------------------------|------------------------|-----------------------|---------|-------------|-------------|---------|
|                                                                          | Glc-1-P                | Fru <sup>f</sup> -6-P | GDP-Man | UDP-Glc2NAc | Glc2NAc-1-P | Sed-7-P |
| Number of nucleotide sugars <sup>d</sup>                                 | 27                     | 2                     | 8       | 16          | 1           | 4       |
| Number of monosaccharides <sup>e</sup>                                   | 25                     | 2                     | 8       | 16          | 1           | 4       |
| Number of monosaccharides with different number of backbone carbon atoms |                        |                       |         |             |             |         |
| Pentose                                                                  | 4                      | -                     | -       | -           | -           | -       |
| Hexose                                                                   | 21                     | 2                     | 8       | 13          | -           | -       |
| Heptulose                                                                | -                      | -                     | -       | -           | -           | 4       |
| Nonulose                                                                 | -                      | -                     | -       | 3           | 1           | -       |
| Number of monosaccharides of the two enantiomeric forms <sup>f</sup>     |                        |                       |         |             |             |         |
| D                                                                        | 19                     | 2                     | 5       | 12          | 1           | 3       |
| L                                                                        | 6                      | -                     | 3       | 4           | -           | 1       |
| Number of monosaccharides of the two ring forms                          |                        |                       |         |             |             |         |
| Pyranose                                                                 | 23                     | 2                     | 8       | 16          | 1           | 4       |
| Furanose                                                                 | 2                      | -                     | -       | -           | -           | -       |
| Number of monosaccharides with different nucleotides                     |                        |                       |         |             |             |         |
| ADP                                                                      | -                      | -                     | -       | -           | -           | 1       |
| CDP                                                                      | 7                      | -                     | -       | -           | -           | -       |
| CMP                                                                      | -                      | -                     | -       | 3           | 1           | -       |
| GDP                                                                      | -                      | 1                     | 8       | -           | -           | 3       |
| TDP/dTDP <sup>g</sup>                                                    | 9                      | -                     | -       | -           | -           | -       |
| UDP                                                                      | 11                     | 1                     | -       | 13          | -           | -       |

177  
178 <sup>a</sup> The monosaccharide L-Iduronic acid has not been considered in this study since there is no separate pathway for its  
179 biosynthesis. Dermatan sulfate epimerase-1 or -2 (DS-epi1 or DS-epi2) catalyses C5-epimerization of glucuronic  
180 acid to L-iduronic acid in chondroitin sulfate polymeric chains (10).

181 <sup>b</sup> Enzymes catalysing one or more steps of the biosynthesis pathway are not characterized experimentally for some  
182 of the monosaccharides. Such monosaccharides were not considered in this study.

183 <sup>c</sup> Glc-6-P is the precursor for Glc-1-P (conversion catalysed by phosphoglucomutase), Fru<sup>f</sup>-6-P (catalysed by  
184 phosphoglucose isomerase) and Sed-7-P (formed in the non-oxidative phase of the pentose phosphate pathway).  
185 Fru<sup>f</sup>-6-P is the precursor of GDP-Man and UDP-Glc2NAc.

186 <sup>d</sup> There are two pathways for the biosynthesis of CMP-Leg5Ac7Ac, one starting from UDP-Glc2NAc and the other  
187 from Glc2NAc-1-P. Hence, the total number of nucleotide sugars will be 57 even though row sum is 58.

188 <sup>e</sup> L-Rhamnose and Qui4NAc are biosynthesized as both UDP- and TDP-/dTDP-derivatives. Hence, the number of  
189 monosaccharides is less than the number of nucleotide sugars by 2.

190 <sup>f</sup> The prefix D is omitted for D enantiomers whereas the prefix L is explicitly mentioned for L enantiomers.



191 <sup>§</sup> No distinction is made between TDP and dTDP in this work since literature suggests that both ribo- and deoxyribo-  
192 substrates are used by enzymes, albeit with varying extents of specificity depending upon the source organism. In  
193 fact, dTDP and TDP have been used synonymously by some authors.

194

195 **Generation of HMM profiles:** An HMM profile was generated for each step of a  
196 biosynthesis pathway except where mentioned otherwise. Profiles were generated  
197 in two steps (Flowchart S1). The extended dataset was created to account for  
198 sequence divergence. In some cases, no additional sequences satisfying the  
199 aforementioned criteria were found, hence there is no Extend dataset. Each profile  
200 was given an annotation based on the enzyme activities of proteins that were used  
201 to generate the profile and an identifier of the format GPExxxxx; here GPE stands  
202 for Glycosylation Pathway Enzyme and xxxxx is a unique 5-digit number  
203 (Supplementary\_data.xlsx:Worksheet1).

204

205 **Setting thresholds for HMM profiles:** Thresholds for HMM profiles were set as  
206 described below (profile-wise details are given in  
207 Supplementary\_data.xlsx:Worksheet1):

208

209 Using ROC curves: TrEMBL database was used to generate ROC curves. Several  
210 of the TrEMBL entries have been assigned molecular function electronically based  
211 on UniRule and SAAS (Table S1). It is assumed that these annotations are correct  
212 while generating ROC curves. True positives, false positives and false negatives  
213 were identified by comparing TrEMBL annotation with profile annotation.

214

215 Using bit-score scatter plots: Members of some enzyme families differ in their  
216 molecular function while retaining significant global sequence similarity e.g., C4-  
217 and C3-aminotransferases. Consequently, annotations of several TrEMBL  
218 sequences belonging to such families are incomplete e.g., DegT/DnrJ/EryC1/StrS  
219 aminotransferase family protein. In such cases, bit score scatter-plots were used to  
220 set thresholds (Figure S5). Scatter plot was also used to set threshold in case of  
221 hydrolysing and non-hydrolysing NDP-Hex2NAc C2 epimerases since many  
222 TrEMBL hits are just annotated as NDP-Hex2NAc C2 epimerases.

223

224 Using  $T_{exp}$  and  $T_{extend}$  as thresholds:  $T_{exp}$  or  $T_{extend}$  was used as the threshold for  
225 some profiles for one of these two reasons: (i) Sequences used to generate the  
226 profile are a subset of the sequences used to generate another profile; the latter set  
227 of enzymes has broader substrate specificity than those of the former set. For  
228 instance, sequences used for generating GPE02430 [TDP-/dTDP-4-keto-6-  
229 deoxyglucose 3-/3,5-epimerase] and GPE02530 (NDP-sugar 3-/3,5-/5-epimerase)  
230 are homologs but the former set has narrow specificity.  $T_{extend}$  was set as  
231 threshold for GPE02430 as lowering the threshold would make this profile less  
232 specific. (ii) For some profiles such as GPE50010 [nucleotide sugar  
233 formyltransferase], very few TrEMBL entries that score  $< T_{exp}$  have been assigned  
234 molecular function and hence ROC curve could not be generated.

235  
236 The case of GPE00530: Scanning TrEMBL database with GPE00530 (Glucose-1-  
237 phosphate uridylyltransferase family 2) using the default threshold of HMMER (e-  
238 value = 10) resulted in 2693 hits with matching annotation and their scores ranged  
239 continuously from 705 to 303 bits and then from 57 to 41 bits. It was not possible  
240 to generate a ROC curve because of this discontinuity. Hence, 303 bits was set as  
241 the threshold.

242  
243 **Profile annotations with broader substrate / product specificities:** Many  
244 sequence homologs catalyse the “same” reaction but with (slightly) different  
245 substrate specificities. Sequence changes that confer such differential specificities  
246 are subtle and often unknown. HMM profiles of such families lack the ability to  
247 discriminate between sequences with varying substrate specificities. Two products,  
248 a major product and a minor product, are formed in certain enzyme catalysed  
249 reactions (11–13). It is possible that only the major product has been characterized  
250 while assaying an enzyme with broader substrate specificity. Another possibility is  
251 that only a subset of possible substrates has been assayed for. Hence, substrate  
252 specificities are broad in annotations of some of the profiles. As opposed to these,  
253 some profiles of aminotransferases and reductases are generated from enzymes  
254 which differ from each other with respect to the product formed viz., orientation  
255 (equatorial or axial) of the newly formed/added -OH / -NH<sub>2</sub> group. Profile for 3,4-  
256 ketoisomerase is also of this type. UDP-GlcA decarboxylase (UXS) converts UDP-

257 GlcA to UDP-4-keto xylose, which is further reduced to UDP-xylose. UDP-4-keto  
258 xylose is a minor product for human UXS whereas it is a major product for *E. coli*  
259 UXS (12). Both these enzymes are used to generate the profile GPE20030  
260 (Supplementary\_data.xlsx:Worksheet1).

261  
262 Pathway steps associated with more than one HMM profile: Some steps are  
263 associated with more than one profile for one of these two reasons: (i) Non-  
264 orthologous enzymes known to catalyse the same reaction e.g.,  
265 phosphomannoisomerases. (ii) Two or more profiles are generated, one with  
266 narrow and the other(s) with broad substrate specificity. Enzymes used for the  
267 former are a subset of enzymes used for the latter type of profiles e.g.,  
268 aminotransferases. The process flow adopted to assign annotation for a sequence  
269 which satisfies thresholds for more than one profile is shown in Flowchart S2.

270  
271 **Finding homologs using BLASTp instead of HMM profiles:** HMM profiles  
272 were generated only when four or more experimentally characterized enzymes are  
273 available (two exceptions are discussed below). Global alignment and sequence  
274 similarity were used as the criteria to infer homology based on BLASTp search.  
275 The default values were set to be  $\geq 90\%$  query coverage and  $\geq 30\%$  sequence  
276 similarity. However, these values were upwardly revised when query sequences  
277 belonged to homologous families that are functionally divergent  
278 (Supplementary\_data.xlsx:Worksheet2). Specifically, similarity and coverage cut-  
279 offs were revised by performing an all-against-all BLASTp search of all  
280 experimentally characterized sequences of monosaccharide biosynthesis pathways.

281  
282 *B. cereus* PdeG (Q81A42\_1-328) is a retaining UDP-Glc2NAc 4,6-dehydratase  
283 (14). It shares higher sequence similarity with inverting UDP-Glc2NAc 4,6-  
284 dehydratases than with retaining dehydratases. The sequence of PdeG was  
285 compared with TrEMBL hits for the HMM profile of inverting UDP-Glc2NAc 4,6-  
286 dehydratases (GPE05331), based on which the sequence similarity cut-off for  
287 PdeG was set to 70%. The threshold for GPE05331 was set such as to exclude  
288 PdeG (Figure S5).

289 Criteria for finding homologs of UDP-2,4-diacetamido-2,4,6-trideoxy- $\beta$ -L-altrose  
290 hydrolase and UDP-4-amino-6-deoxy-Glc2NAc acetyltransferase: Four  
291 experimentally characterized enzymes are known for each of these two families.  
292 However, BLASTp approach was used instead of generating an HMM profile. This  
293 is because a suitable bit score threshold could not be arrived, which in turn, was  
294 because several of the TrEMBL entries obtained as hits are annotated as CMP-N-  
295 acetylneuraminic acid synthetase or equivalent (for hydrolase), or O-  
296 acetyltransferase or equivalent (for acetyltransferase).

297 **Uncertainties in prediction:** Any description of molecular function of a protein is  
298 stratified and includes specifying the type of reaction catalysed, substrate(s) used,  
299 etc. A vast majority of sequences conceptually translated from genome sequences  
300 are assigned molecular function based on sequence homology to experimentally  
301 characterized proteins. Even though experimental validation is available for only a  
302 small fraction of proteins due to practical constraints, such studies have shown that  
303 homology-based assignments are generally valid and deviations typically pertain to  
304 the extent of substrate specificity, metal ion dependency and such. Nevertheless,  
305 caution is warranted with increasing sequence divergence and one has to be on the  
306 lookout for homologs that have acquired new molecular function as a result of  
307 mutation of a handful of key residues (neo-functionalization). In view of this, in  
308 the present study, HMM and BLASTp thresholds have been chosen with higher  
309 stringency and assignment of substrate(s) and product(s) has been made  
310 conservatively by manually curating false positives and false negatives from the  
311 Swiss-Prot database, details of which are given below:

312  
313 (1) Both GDP-rhamnose and GDP-6-deoxytalose are assigned as products of the  
314 same pathway, because their biosynthesis proceeds through the same pathway with  
315 the exception of the last step being catalysed by homologous 4-reductases. It is not  
316 possible to infer if product specificity of enzymes in this family is absolute or  
317 partial i.e., one is a major product and other, a minor product, due to inadequate  
318 experimental data. An identical situation is seen in the pathways for the  
319 biosynthesis of CDP-cillose and CDP-cereose, and for CDP-abequose and CDP-

320 paratose. In view of this, prevalence data will be the same for the two  
321 monosaccharides of a pair (Supplementary\_data.xlsx:Worksheet3).

322 (2) Non-hydrolyzing NDP-Hex2NAc C2-epimerases (GPE02030) are part of  
323 biosynthesis pathways of different monosaccharides. The extent of substrate  
324 specificity of the experimentally characterized members of this family is not  
325 known since not all enzymes have been assayed using all possible substrates. In  
326 literature, substrate specificity is arrived at based on the genomic context and the  
327 same approach has been followed in the present study as well. For example, hits  
328 for GPE02030 profile are treated as Man2NAc synthesis pathway enzymes, unless  
329 other enzymes of L-Fuc2NAc, L-Qui2NAc or Man2NAc3NAcA pathway are also  
330 present.

331 (3) Some monosaccharides are precursors for other monosaccharides and hence,  
332 genomes predicted to have the pathway for the latter monosaccharide will also  
333 have the precursor monosaccharide. Following are the precursor-final product  
334 monosaccharide pairs encountered in this study: (i) L-Rha2NAc  $\rightarrow$  L-Qui2NAc,  
335 (ii) L-Rhamnose  $\rightarrow$  6-Deoxy-L-talose, (iii) Fucose  $\rightarrow$  Fucofuranose, (iv) Paratose  
336  $\rightarrow$  Tyvelose, (v) Galactose  $\rightarrow$  Galactofuranose, (vi) GlcA  $\rightarrow$  GalA, (vii) L-Ara4N  
337  $\rightarrow$  L-Ara4NFo, (viii) Per  $\rightarrow$  Per4Ac, (ix) Man2NAc  $\rightarrow$  Man2NAcA, (x)  
338 Glc2NAcA  $\rightarrow$  Gal2NAcA, and (xi) Bac2Ac4Ac  $\rightarrow$  Leg5Ac7Ac.

339 (4) The pathway for the synthesis of L-arabinose is an extension of the pathway for  
340 the synthesis of xylose. However, most genomes predicted to have xylose pathway  
341 also have L-arabinose pathway. This is because UDP-sugar C4-epimerase family  
342 members (GPE02230) catalyse C4-epimerization of glucose, GlcA, Glc2NAc,  
343 Glc2NAcA and xylose. Assigning substrate specificity solely based on sequence  
344 similarity is not possible. The challenge is compounded by the fact that some of  
345 these enzymes show broad substrate specificity while the rest are only specific to a  
346 single substrate. Not all enzymes have been assayed for all potential substrates.

## 347 **Results**

348 **Glycan alphabet size is not the same across Archaea and across Bacteria:** The  
349 number of monosaccharides used by different species is significantly different  
350 (Figure 1) and is independent of proteome size (Figure S3). Data for the prevalence  
351 of monosaccharides in 12939 genomes is very similar to that in 3384 species  
352 (Figure S4) indicating that the outcome is not biased by the skew in the number of  
353 genomes (strains) sequenced for a given species (Figure S1). In fact, none of the  
354 organisms use all 55 monosaccharides: the highest number of monosaccharides  
355 used by an organism is 23 [*Escherichia coli* 14EC033]. Just 1 and 2  
356 monosaccharides are used by 188 and 117 species, respectively. Glucose, galactose  
357 and mannose, and their 2-N-acetyl (Glc2NAc, Gal2NAc, Man2NAc) and uronic  
358 acid (GlcA, GalA, Glc2NAcA, Gal2NAcA) derivatives are the most prevalent  
359 besides L-rhamnose, as the biosynthesis pathways for these monosaccharides are  
360 found in >50% of genomes (Figure 2). These monosaccharides are thus  
361 categorized as ‘Common’ group. However, none of them are used by all organisms  
362 (Supplementary\_data.xlsx:Worksheet3).

363  
364 **Figure 1 The number of monosaccharides for which biosynthesis pathways are found in a**  
365 **species.** More than one strain is sequenced for several species (Figure S1). In such cases, data for  
366 the strain which has the highest number of monosaccharides is plotted. Total number of species =  
367 3384.

368  
369 **Figure 2 Classification of monosaccharides into three groups based on prevalence in**  
370 **archaeal+bacterial genomes.** These groups are Common (found in  $\geq 50\%$  of genomes), Less  
371 Common and Rare (found in  $\leq 10\%$  of genomes). Abbreviated names are used for some of the  
372 monosaccharides. Full names of these are given in Supplementary\_data.xlsx:Worksheet4.

373  
374 **Evolution and diversification of glycan alphabet:** It is observed that only a  
375 limited set of enzymes suffice to biosynthesize the Common group  
376 monosaccharides e.g., nucleotidyltransferases (activation), amidotransferase and  
377 N-acetyltransferase (Hex2NAc from a hexose), C4-epimerase (Glc to Gal) and C6-  
378 dehydrogenase (uronic acid) belonging to the SDR superfamily, non-hydrolyzing  
379 C2-epimerase (Glc2NAc to Man2NAc), mutase (6-P to 1-P) and isomerase  
380 (pyranose to furanose) (Figure 3 and Supplementary\_data.xlsx:Worksheet5). Using  
381 this limited set of monosaccharides, organisms seem to achieve structural diversity



382 by mechanisms such as alternative isomeric linkages, branching and repeat length  
383 heterogeneity. Some organisms use an additional set of monosaccharides, viz., L-  
384 fucose, galactofuranose, xylose, L-Ara4N and L-arabinose. These monosaccharides  
385 are categorized as Less Common group. Organisms using this group of  
386 monosaccharides have enhanced the glycan repertoire by acquiring C3/C5-  
387 epimerase, 4,6-dehydratase, C4-reductase, C6-decarboxylase and C4-  
388 aminotransferase. The rest of the monosaccharides are used by very few organisms  
389 and thus constitute the 'Rare' group (Figure 2).

390  
391 **Figure 3 A qualitative comparison of the number of monosaccharides of the three groups viz.,**  
392 **Common (C), Less Common (LC) and Rare (R) with their prevalence in archaeal+bacterial**  
393 **genomes and the number of types of enzymes required for their biosynthesis.** The size of a group is  
394 inversely related to the prevalence of the corresponding group of monosaccharides. Enzymes required for  
395 the biosynthesis of Common group monosaccharides are required for the biosynthesis of Less Common  
396 and Rare groups also; similarly, those for the Less Common group are required for the biosynthesis of  
397 Rare group also. Different enzymes belonging to each of the superfamily mentioned above are listed in  
398 the file Supplementary\_data.xlsx:Worksheet5. Note that the group sizes are not to scale. It may be noted  
399 that additional types of enzymes may have to be included when experimental data about the pathways for  
400 the biosynthesis of other monosaccharides becomes available.

401 HAD, haloalkanoic acid dehalogenase  
402 Gfo/Idh/MocA, glucose  $\square$  fructose oxidoreductase/inositol 2  $\square$  dehydrogenase/rhizopine catabolism protein  
403 MocA  
404 GNAT, GCN5-related N-acetyltransferases  
405 L $\beta$ H, left handed  $\beta$  helix  
406 PEP, phosphoenolpyruvate  
407 PLP, pyridoxal 5'-phosphate  
408 SAM, S-adenosyl-L-methionine  
409 SDR, short chain dehydrogenase reductase  
410 UDP, uridine diphosphate

411  
412 Occurrence of the Common group of monosaccharides in all three domains of life  
413 points to their presence early on during evolution. Neo- and sub-functionalization  
414 of horizontally acquired and duplicated genes during the course of evolution have  
415 been widely reported (e.g.,(15,16)). It is envisaged that the enzymes required for  
416 the biosynthesis of Rare group monosaccharides have arisen by such neo- and sub-  
417 functionalization. Aminotransferase and short-chain dehydrogenase reductase  
418 (SDR) superfamily enzymes involved in the biosynthesis of monosaccharides lend  
419 support to this inference. Superposition of a few C3- and C4-aminotransferases



420 show remarkable conservation of the 3D structures despite differences in the  
421 pyranose ring position at which the amino group is transferred as well as the  
422 nucleotide sugar substrate (Figure 4). 3D structures are conserved even among  
423 SDR superfamily enzymes despite catalysing different reactions viz., epimerization  
424 (at C2 or C4), removal of water (dehydratase at C4, C6) and reduction (at C4).

425  
426 **Figure 4 3D structural superimposition of enzymes belonging to aminotransferase (A) and SDR (B)**  
427 **superfamilies involved in the biosynthesis of monosaccharides.** Color scheme: helices, raspberry red;  
428 sheet, forest green; loops, light blue. **Panel A:** Aminotransferase superfamily enzymes: 1MDO\_A: ArnB  
429 from UDP-L-Ara4N biosynthesis; 2FNI\_A: PseC from CMP-L-Pse45Ac7Ac biosynthesis; 2OGA\_A:  
430 DesV from TDP-/dTDP-desosamine biosynthesis; 3BN1\_A: perA from GDP-per biosynthesis; 3NYU\_A:  
431 WbpE from UDP-Man2NAc3NAcA biosynthesis; 4PIW\_A: WecE from TDP-/dTDP-Fuc4NAc  
432 biosynthesis; 4ZTC\_A: PglE from CMP-Leg5Ac7Ac biosynthesis; 5U1Z\_A: wlaRG from TDP-/dTDP-  
433 Fuc3NAc/Qui3NAc biosynthesis. ArnB, PseC, perA, WecE and PglE are C4-aminotransferases whereas  
434 DesV, WbpE and wlaRG are C3-aminotransferases. **Panel B:** 1ORR\_A: RfbE, C2-epimerase from CDP-  
435 tyvelose biosynthesis; 2PK3\_A: Rmd, 4-reductase from GDP-rhamnose biosynthesis; 1KBZ\_A: rmlD,  
436 C4-reductase from TDP-/dTDP-L-rhamnose biosynthesis; 1T2A\_A: gmd, C4,C6-dehydratase from GDP-  
437 L-fucose biosynthesis; 1SB8\_A: WbpP, C4-epimerase from UDP-Gal2NAc biosynthesis; 5BJU\_A: PglF,  
438 C4,C6-dehydratase from UDP-Bac2Ac4Ac biosynthesis.

439  
440  
441 **Glycan alphabet varies even across strains:** Remarkably, variations in the size of  
442 glycan alphabet are significant even at the strain level (Figure 5). Strain-specific  
443 differences are pronounced in species such as *E. coli*, *Pseudomonas aeruginosa*  
444 and *Campylobacter jejuni* (Figure 6) possibly reflecting the diverse environments  
445 that these organisms inhabit. Among organisms which inhabit the same  
446 environment, strain-specific differences show mixed pattern: among the 71 strains  
447 of *Streptococcus pneumoniae*, the maximum and minimum number of  
448 monosaccharides utilized by a strain are 4 and 12, respectively. Such a variation  
449 could have evolved as a mechanism to evade host immune response. In contrast,  
450 strains of *Streptococcus pyogenes* and strains of *Staphylococcus aureus* inhabit the  
451 same environment (respiratory tract and skin, respectively) and show very little  
452 variation in the monosaccharides they use. Both are capsule producing  
453 opportunistic pathogens suggesting that they might bring about antigenic variation  
454 by variations in linkage types, branching etc. (17), even with the same set of  
455 monosaccharides. Strains of *Mycobacterium tuberculosis*, *Brucella melitensis*,  
456 *Brucella abortus* or *Neisseria gonorrhoeae*, all of which are human intracellular  
457 pathogens, also show insignificant variation. It is possible that different strains of a

458 pathogen are a part of distinct microbiomes and microbial interactions within the  
459 biome/with the host determine the glycan alphabet of the organism. Availability of  
460 additional characteristics such as phenotypic data and temporal variations in glycan  
461 structures is critical for understanding the presence/absence of strain-specific  
462 variations.

463  
464 **Figure 5 Variations in the number of monosaccharides used by different strains of a species.** Species  
465 with more than one sequenced strain and at least one monosaccharide predicted in one of the strains are  
466 considered. Only the smallest and largest numbers are shown.

467 **Figure 6 Different strains of some of the species do not use the same number of monosaccharides.**  
468 The range of the number of monosaccharides used by various strains of some of the clinically important  
469 species are shown here. The number of sequenced strains for each organism is shown above the  
470 corresponding bar. Number in parenthesis after the name of each organism represents the minimum  
471 number of monosaccharides used by one of the strains of this organism. Note that the set of  
472 monosaccharides encoded by different strains utilizing the same number of monosaccharides may vary.  
473 Organisms associated with narrow habitat are shown in blue, while those with broad habitat are shown in  
474 purple.

475 **Prevalence of monosaccharides across Phyla:** Not all sugars of the Common  
476 group (Figure 1) are found across all phyla whereas Neu5Ac belonging to the Rare  
477 group is found across all phyla. GlcA and GalA (Common group) are absent in  
478 Thermotogae suggesting that pathways for their biosynthesis are lost in this  
479 phylum. A similar conclusion is drawn for the absence of L-fucose and L-colitose  
480 in TACK group phylum. Most of the Rare group sugars are limited to very few  
481 species in a few phyla (Figure 7). For instance, Fuc4NAc and *L-glycero-β-D-*  
482 *manno*-heptose (ADP-linked) are found only in Gamma-proteobacteria, a class that  
483 comprises of several pathogens. The other three heptoses, which are GDP-linked,  
484 are absent in Gamma-proteobacteria. Recently, it was found that *Helicobacter*  
485 *pylori*, belonging to the class Epsilon-proteobacteria, synthesizes *ADP-glycero-β-*  
486 *D-manno*-heptose for activating the NF-κβ pathway in human epithelial cells (18).  
487 This pathway has been experimentally characterized in very few organisms.  
488 Consequently, homologs for this pathway are found by BLASTp queries and not  
489 by HMM profiles. In the present study, this pathway turned out to be a false  
490 negative because of the high stringency set for BLASTp thresholds. In view of this,  
491 it is possible that such sugars which appear restricted to a few phyla are also found  
492 in others.

493

494 **Figure 7 Prevalence of Less Common and Rare group monosaccharides in different microbial**  
495 **phyla.** Data for phyla with less than five sequenced genomes are not shown to avoid visual clutter. Only  
496 names of monosaccharides are used for annotation even though all are biosynthesized as nucleotide  
497 sugars. Abbreviated names are used for some of the monosaccharides. Full names of these are given in  
498 Supplementary\_data.xlsx:Worksheet4.  
499

500 **Why some eubacteria do not biosynthesize any monosaccharide?** None of the  
501 monosaccharides are biosynthesized by some mollicutes (e.g., *Mycoplasma*) and  
502 endosymbionts (e.g., *Ehlichia sp.* and *Orientia sp.*) because the biosynthesis  
503 pathways are completely absent. Mollicutes lack cell wall (19) which could explain  
504 the absence of monosaccharides. Endosymbionts have reduced genomes which is  
505 seen as an adaptation to host dependence (20) (21). Biosynthesis pathway enzymes  
506 are lost / are being lost as part of the phenomenon of genome reduction. This is  
507 illustrated by the endosymbiont *Buchnera aphidicola*: 13 of the 25 strains have the  
508 pathway for the biosynthesis of UDP-Glc2NAc, 7 have partial pathway and 5 do  
509 not encode any gene of this pathway. Pathway for none of the other  
510 monosaccharides are found in this organism. Pathways are incomplete i.e.,  
511 enzymes catalysing one or more steps of the pathway are absent in some  
512 organisms. Some species of *Mycoplasma*, *Ureaplasma* and *Spiroplasma* lack  
513 mannose-1-phosphate guanylyltransferase because of which GDP-mannose is not  
514 biosynthesized. GlmU which converts Glc2N-1-phosphate to UDP-Glc2NAc is  
515 absent in *Chlamydia sp.* However, Glc2N is found in the LPS of *Chlamydia*  
516 *trachomatis* (22). Whether this is indicative of the presence of a transferase which  
517 uses Glc2N-1-phosphate instead of UDP-Glc2N needs to be explored.  
518

519 **Do *Rickettsia sp.* and *Chlamydia sp.* source monosaccharides from their host?**  
520 *Rickettsia sp.* (60 strains), *Orientia tsutsugamushi* (7 strains), and *Chlamydia sp.*  
521 (143 strains) are obligate intracellular bacteria. *O. tsutsugamushi* does not contain  
522 pathways for the biosynthesis of any of the monosaccharides. This is in  
523 consonance with the finding that it does not contain extracellular polysaccharides  
524 (21). *Rickettsia* species have pathways for the biosynthesis of Man2NAc, L-  
525 Qui2NAc and L-Rha2NAc. L-Rha2NAc is the immediate precursor for L-Qui2NAc  
526 (Figure S2e). *Rickettsia* are known to use Man2NAc and L-Qui2NAc but not L-  
527 Rha2NAc (23) implying that UDP-L-Rha2NAc is just an intermediate in these  
528 organisms. The pathway for the biosynthesis of UDP-Glc2NAc, precursor for these

529 Hex2NAcs, is absent suggesting partial dependence on host (human). Notably,  
530 genes for the biosynthesis of Man2NAc and L-Qui2NAc have so far not been  
531 reported in humans, which explains why Rickettsia have retained these pathways  
532 (the human genome was scanned and these pathways are not found; unpublished  
533 data). Both Rickettsia and Orientia belong to the same order, Rickettsiales.  
534 Symptoms caused by these two are similar (24). In spite of similarities in host  
535 preference and pathogenicity, *Rickettsia sp.* continues to use certain  
536 monosaccharides while diverging from *O. tsutsugamushi* (25) which uses none. Is  
537 this because Rickettsia use ticks as vectors whereas Orientia use mites (26)?  
538 *Rickettsia akari*, the only Rickettsial species which uses mites as vectors and  
539 contains pathways for Man2NAc and L-Qui2NAc biosynthesis, has been proposed  
540 to be placed as a separate group because its genotypic and phenotypic  
541 characteristics are intermediate to those of Orientia and Rickettsia (26).

542

543 **Absence of Glc2NAc in organisms other than endosymbionts:** UDP-Glc2NAc  
544 is the precursor for the biosynthesis of several monosaccharides (Figures S2e, S2f).  
545 However, pathways for its biosynthesis are absent in ~10% of the genomes  
546 excluding endosymbionts. None of the organisms in FCB group and Spirochaetes  
547 contain this monosaccharide. Further analysis revealed the loss of first (GlmS) or  
548 last (GlmU) enzyme of the pathway in several of their genomes. This pattern  
549 suggests that organisms of this phyla are in the process of losing UDP-Glc2NAc  
550 pathway. Incidentally, some of these genomes do contain its derivatives. They  
551 include host-associated organisms such as *Bacteriodes fragilis*, *Flavobacterium*  
552 *sp.*, *Tannerella forsythia*, *Akkermansia muciniphila*, *Bifidobacterium bifidum*,  
553 *Leptospira interrogans*, etc., suggesting that they obtain Glc2NAc from their  
554 microenvironment. However, a few free-living organisms which contain  
555 derivatives of UDP-Glc2NAc but not UDP-Glc2NAc were also identified. For  
556 instance, GlmU is not present in *Arcticibacterium luteifluviistationis* (arctic surface  
557 seawater) and its C-terminus (acetyltransferase domain) is absent in  
558 *Chlorobaculum limnaeum* (freshwater). Nonetheless, both organisms contain the  
559 UDP-L-Qui2NAc pathway cluster.

560

561 **Prevalence of enantiomeric pairs and isomers of N-acetyl derivatives:** Both  
 562 enantiomers of a few monosaccharides are reported in natural glycans. The two  
 563 enantiomers may or may not be biosynthesized from the same precursor, and may  
 564 be linked to different nucleotides (Table S2). The present analysis shows that both  
 565 enantiomers are found in only a small number of organisms, that too in specific  
 566 genera, class or phyla (Table 3). Three isomeric N-acetyl derivatives of fucosamine  
 567 (6-deoxygalactosamine) and of quinovosamine (6-deoxyglucosamine) are found in  
 568 living systems. The N-acetyl group is present at C2, C3 or C4 position in these  
 569 isomers. Only few organisms use more than one of these three isomers (Table 3).  
 570 One such organism is *E. coli* NCTC11151 which contains both Fuc4NAc and  
 571 Fuc3NAc. In contrast, *E. coli* O177:H21 uses L-Fuc2NAc along with Fuc3NAc.  
 572 Genomic context analysis showed that Fuc4NAc biosynthesis genes are part of the  
 573 O-antigen cluster in both these strains. On the other hand, genes for the  
 574 biosynthesis of Fuc3NAc (in NCTC11151) and L-Fuc2NAc (in O177:H21) are  
 575 present as part of the colanic acid cluster. Four genomes (strains) of *Pseudomonas*  
 576 *orientalis* use Qui4NAc, Qui2NAc and L-Qui2NAc; genes required for the  
 577 biosynthesis of these three monosaccharides are all in the same genomic  
 578 neighbourhood.

579

580 **Table 3 Presence of enantiomeric pairs and isomeric N-acetyl derivative pairs§**

| Monosaccharide                   | Where present                            | Number of organisms (genomes) in which these monosaccharide pairs are used |
|----------------------------------|------------------------------------------|----------------------------------------------------------------------------|
| <b>Both D- and L-enantiomers</b> |                                          |                                                                            |
| Galactose                        | Extremophiles                            | 33                                                                         |
| Fucose                           | Phylum FCB group                         | 7                                                                          |
|                                  | Phylum Deferribacteres                   | 1                                                                          |
|                                  | Class Gammaproteobacteria                | 10                                                                         |
| Rhamnose                         | Genus <i>Pseudomonas</i>                 | 338                                                                        |
| 6-Deoxytalose                    | Genus <i>Pseudomonas</i>                 | 140                                                                        |
| Qui2NAc <sup>†</sup>             | Phylum Proteobacteria                    | 64                                                                         |
| Fuc2NAc                          | Genus <i>Staphylococcus</i> <sup>¶</sup> | 300                                                                        |



| Isomers of N-acetyl derivatives  |                           |     |
|----------------------------------|---------------------------|-----|
| Fuc3NAc and Fuc4NAc <sup>‡</sup> | Family Enterobacteriaceae | 33  |
| Qui2NAc, Qui4NAc                 | Several phyla             | 193 |

581 <sup>§</sup> The diastereomeric pair of Fuc4NAc and L-Fuc2NAc are found in some strains of *Escherichia coli*.

582 <sup>¶</sup> Both Fuc2NAc and L-Fuc2NAc are components of capsular polysaccharides (27)

583 <sup>†</sup> Abbreviated names are used for some of the monosaccharides. Full names of these are given in  
584 Supplementary\_data.xlsx:Worksheet4.

585 <sup>‡</sup> Glucose-1-phosphate is the precursor for both Fuc3NAc and Fuc4NAc and UDP-Glc2NAc is the  
586 precursor for Fuc2NAc (the isomer that is absent in these organisms).

587

### 588 **Why are some pathways not found in Archaea?**

589 Most of the rare group monosaccharides are absent in Archaea. Members of  
590 Euryarchaeota contain higher number of monosaccharides than TACK group. This  
591 could be suggestive of lateral gene transfer events with bacterial members as  
592 members of Euryarchaeota, particularly methanogens, coexist with other  
593 organisms in microbiomes (28) and have been inferred to acquire their genetic  
594 content (29). It is premature to associate absence of monosaccharide diversity to  
595 the apparent lack of pathogenicity in Archaea (28). This is because of inadequate  
596 information regarding the abundance of Archaea in various microbiomes. This in  
597 turn is due to our limitations in the detection of Archaea and associating them with  
598 disease phenotypes.

599

600 Apart from these possibilities, methodological limitations may have resulted in  
601 apparent absence of monosaccharides in Archaea. Only 4-5% of the 789 sequences  
602 used for generating HMM profiles or as BLASTp queries are from archaea. The  
603 pathway for the biosynthesis of TDP-/dTDP-L-rhamnose has four enzymes viz.,  
604 RmlA, RmlB, RmlC and RmlD. Of these, only RmlB could not be found by HMM  
605 profile in *Saccharolobus sp.*, *Desulfurococcus sp.* and *Sulfolobus sp.* leading to the  
606 conclusion that L-rhamnose is absent in these organisms. Analysis of the  
607 neighbourhood of RmlA, RmlC and RmlD revealed a sequence which could  
608 potentially be RmlB since it retains conserved residues of this family. This  
609 sequence could not be captured by the profile-based search due to stringent  
610 thresholds (=400 bits) [profile GPE05430; Supplementary\_data.xlsx:Worksheet1].

611 Potential RmlB sequences of these organisms score 300-350 bits. This observation  
612 suggests that the pathway exists in these organisms but was not identified due to  
613 the stringency of the threshold. However, this is in contrast to other cases of  
614 absence of monosaccharides wherein none of the proteins of a pathway in the  
615 genome score even the default bit score of HMMER (i.e., 10 bits).

616  
617 **Use of more than one nucleotide derivative/alternative pathways:** L-rhamnose  
618 and Qui4NAc are biosynthesized as both UDP- and TDP-/dTDP-derivatives  
619 (Figures S2a, S2c). However, the TDP-/dTDP-pathways are found in Archaea and  
620 Bacteria, but not the UDP-pathways. TDP-/dTDP-6-deoxy-L-talose is  
621 biosynthesized via reduction of TDP-/dTDP-4-keto-L-rhamnose or C4  
622 epimerization of TDP-/dTDP-L-rhamnose (Figure S2a). The former pathway  
623 occurs in 141 genomes belonging to multiple phyla and notably in *Pseudomonas*  
624 *sp.*, *Streptococcus sp.* and *Streptomyces sp.* The latter pathway is found in 255  
625 genomes belonging to Proteobacteria and Terrabacteria, and notably in  
626 *Burkholderia sp.*, *Mycobacterium sp.* and *Xanthomonas oryzae*. N,N'-diacetyl  
627 legionaminic acid can be biosynthesized either from UDP-route or GDP-route  
628 (Figure S2f). The latter pathway is found in 93 of 96 genomes of *Campylobacter*  
629 *jejuni* whereas the former is found in 10 other genomes primarily belonging to  
630 Bacteroidetes/Chlorobi class.

631

## 632 **Discussion**

633 The importance of glycans, especially in Archaea and Bacteria, is well  
634 documented. Establishing the specific role of glycans and studying structure-  
635 function relationship is largely hindered by factors such as non-availability of high-  
636 throughput sequencing methods, inadequate information as to which genes are  
637 involved in non-template driven biosynthesis, phase variation (30) and  
638 microheterogeneity (7). In this study, completely sequenced archaeal and bacterial  
639 genomes were searched for monosaccharide biosynthesis pathways using sequence  
640 homology-based approach. It is found that the usage of monosaccharides is not at  
641 all conserved across Archaea and Bacteria. This is in stark contrast to the alphabets  
642 of DNA and proteins which are universal. In addition, marked differences are  
643 observed even among different strains of a species. The range of monosaccharides  
644 used by an organism seems to be influenced by environmental factors such as



645 growth (nutrients, pH, temperature, ...) and environmental (host, microbiome, ...)   
646 conditions. For instance, high uronic acid content in exopolysaccharides of marine   
647 bacteria imparts anionic property which is implicated in uptake of Fe<sup>3+</sup> thus   
648 promoting its bioavailability to marine phytoplankton for primary production (31)   
649 and against degradation by microbes (32). Mutation in genes that encode enzymes   
650 for the biosynthesis of LPS in *E. coli* was shown to confer resistance to T7 phage   
651 (33). Thus, organisms, even at the level of strains, seem to evolve to modify their   
652 monosaccharide repertoire to increase fitness. In fact, selection pressure and   
653 horizontal gene transfer events could be the reason for the monosaccharide   
654 repertoire of bacteria far exceeding those of mammalian and other eukaryotes.

655   
656 Genes encoding enzymes for the biosynthesis of Neu5Ac are found in 5% and   
657 0.6% genomes of Alpha-proteobacteria and Actinobacteria, respectively; the   
658 bacterial carbohydrate structure database had no Neu5Ac-containing glycan from   
659 organisms belonging to this class/phylum (9). L-Rhamnose and L-fucose are found   
660 in 16% of Delta- and Epsilon-proteobacteria genomes and in 25% of actinobacteria   
661 genomes. However, very few L-rhamnose- and L-fucose-containing glycans from   
662 these classes/phyla are deposited in the database leading to the inference that these   
663 are rare sugars in this class/phylum. Thus, inferring monosaccharide usage based   
664 on an analysis of experimentally characterized glycans can at best give a partial   
665 picture.

666   
667 Rare group monosaccharides are those which are found only in a few species, few   
668 genera and few phyla. Reasons for acquiring Rare group sugars can at best be   
669 speculative. For instance, Bac2Ac4Ac occurs at the reducing end of glycans N-   
670 and O-linked to proteins (34) but the presence of Bac2Ac4Ac is not mandatory for   
671 *C. jejuni* PglB, an oligosaccharyltransferase, since it can transfer glycans which   
672 have Glc2NAc, Gal2NAc or Fuc2NAc also at the reducing end (35). Perhaps,   
673 Bac2Ac4Ac provides resistance to enzymes like PNGase F that cleave off N-   
674 glycans. L-rhamnose, Neu5Ac, L-Qui2NAc, Man2NAc and L-Ara4N are not used   
675 by *Leptospira biflexa* (a non-pathogen) but are used by *Leptospira interrogans* (a   
676 pathogen). It is tempting to infer that these monosaccharides impart virulence to   
677 the latter but analysis of monosaccharides used by *E. coli* strains belonging to   
678 multiple pathotypes (enterohemorrhagic, enteropathogenic, uropathogenic) did not

679 reveal any relationship between monosaccharides and their phenotype. Tyvelose,  
680 paratose and abequose are 3,6-dideoxy sugars that belong to the Rare group. These  
681 are found primarily in *Salmonella enterica*, *Yersinia pestis* and *Yersinia*  
682 *pseudotuberculosis*. These are present in the O-antigen of *Y. pseudotuberculosis*  
683 (36). *Y. pestis*, closely related to and derived from *Y. pseudotuberculosis*, lacks O-  
684 antigen (rough phenotype) due to the silencing of O-antigen cluster (37). *Y.*  
685 *enterocolitica*, also an enteric pathogen like *Y. pseudotuberculosis*, does not  
686 contain these monosaccharides. Hence the role of these 3,6-dideoxy sugars in the  
687 O-antigen of *Y. pseudotuberculosis* does not seem to be related to  
688 enteropathogenicity.

689  
690 Besides answering the question of the universality of glycan alphabet, this study  
691 also has led to certain beneficial outcomes. L-rhamnose, mannose and L-  
692 Pse5ac7Ac are found in *B. cereus*, *B. mycoides* and *B. thuringiensis* but not in *B.*  
693 *subtilis*, *B. amyloliquefaciens*, *B. licheniformis*, *B. velezensis* and *B. vallismortis*.  
694 Such differences may be potentially be exploited towards taxonomic identification,  
695 provided that these patterns hold true after analysis of a larger number of strains  
696 from each of these species. Enzymes synthesizing monosaccharides that are  
697 exclusive to a pathogen vis-à-vis its host can be identified as potential drug targets.  
698 An illustrative example is of the non-hydrolyzing C2 epimerase: it mediates the  
699 synthesis of UDP-Man2NAc, UDP-L-Qui2NAc, UDP-L-Fuc2NAc and UDP-  
700 Man2NAc3NAc and is found in 60% of the archaeal+bacterial genomes but not in  
701 humans (human genome was scanned for the presence of these pathways;  
702 unpublished results). It has already been reported that inhibitors of this enzyme are  
703 effective against methicillin-resistant *S. aureus* and a few other bacteria (38).  
704 Based on the prevalence of this enzyme in all other phyla, inhibitors against this  
705 enzyme would be promising broad spectrum antimicrobial therapies. As already  
706 noted (39), knowledge of monosaccharide composition is also useful in ensuring  
707 consistency of recombinant glycoprotein therapeutics. Knowledge of biosynthesis  
708 pathways also allows cloning the entire cassette in a heterologous host for large  
709 scale production of monosaccharides for commercial and research applications.

710  
711 Thus, glycans show least evolutionary conservation among these three  
712 macromolecules (40). Owing to their virtue of endowing distinction, existence of a

713 universal glycan alphabet is antithetical. Here, alphabet is used in the same sense  
714 as its dictionary meaning, viz., a set of letters or symbols which combine to form  
715 complex entities. In the case of glycans, structural diversity arises not only by the  
716 set of monosaccharides an organism uses but also by linkage variations ( $\alpha 1 \rightarrow 3$ ,  
717  $\beta 1 \rightarrow 4$ , etc.), branching and modifications (e.g., sulfation, acetylation, ...).  
718 Knowledge of the linkage types, branching patterns and modifications that an  
719 organism uses will further our understanding of the biological roles of glycans.

720 **Author contributions**

721 PVB conceived and supervised the research, PS conceived the design and guided  
722 the development of GlycoPathDB. JS performed the research and developed the  
723 database. PVB and JS wrote the paper.

724

725 **Conflicts of interest**

726 The author(s) declare that there are no conflicts of interest

727

728 **Funding information**

729 This work received no specific grant from any funding agency

730

731 **Acknowledgments**

732 We thank Nitesh Kumar, Ruchi Kumari, Tejas Shah and Tejas Vaidya for technical  
733 assistance on the development of GlycoPathDB. We thank Shradha Khater and  
734 Toshi Mishra for useful discussion. Jaya Srivastava is thankful to the Council of  
735 Scientific and Industrial Research, Government of India for research fellowship  
736 (File number 09/087/(0877)/2017-EMR-I).

737

## 738 **References**

- 739 1. Varki A. Biological roles of oligosaccharides: all of the theories are correct. *Glycobiology*.  
740 1993;3(2):97–130.
- 741 2. Mostowy RJ, Croucher NJ, De Maio N, Chewapreecha C, Salter SJ, Turner P, et al.  
742 Pneumococcal Capsule Synthesis Locus cps as Evolutionary Hotspot with Potential to  
743 Generate Novel Serotypes by Recombination. *Mol Biol Evol*. 2017 01;34(10):2537–54.
- 744 3. Mostowy RJ, Holt KE. Diversity-Generating Machines: Genetics of Bacterial Sugar-  
745 Coating. *Trends Microbiol*. 2018;26(12):1008–21.
- 746 4. Gabius H-J, Roth J. An introduction to the sugar code. *Histochem Cell Biol*. 2017  
747 Feb;147(2):111–7.
- 748 5. Bravo D, Silva C, Carter JA, Hoare A, Alvarez SA, Blondel CJ, et al. Growth-phase  
749 regulation of lipopolysaccharide O-antigen chain length influences serum resistance in  
750 serovars of Salmonella. *J Med Microbiol*. 2008 Aug;57(Pt 8):938–46.
- 751 6. Kalynych S, Morona R, Cygler M. Progress in understanding the assembly process of  
752 bacterial O-antigen. *FEMS Microbiol Rev*. 2014 Sep;38(5):1048–65.
- 753 7. Johannessen C, Koomey M, Børud B. Hypomorphic glycosyltransferase alleles and  
754 recoding at contingency loci influence glycan microheterogeneity in the protein  
755 glycosylation system of Neisseria species. *J Bacteriol*. 2012 Sep;194(18):5034–43.
- 756 8. Kaltner H, Abad-Rodríguez J, Corfield AP, Kopitz J, Gabius H-J. The sugar code: letters  
757 and vocabulary, writers, editors and readers and biosignificance of functional glycan-lectin  
758 pairing. *Biochem J*. 2019 24;476(18):2623–55.
- 759 9. Herget S, Toukach PV, Ranzinger R, Hull WE, Knirel YA, von der Lieth C-W. Statistical  
760 analysis of the Bacterial Carbohydrate Structure Data Base (BCSDB): characteristics and  
761 diversity of bacterial carbohydrates in comparison with mammalian glycans. *BMC Struct*  
762 *Biol*. 2008 Aug 11;8:35.
- 763 10. Malmström A, Bartolini B, Thelin MA, Pacheco B, Maccarana M. Iduronic acid in  
764 chondroitin/dermatan sulfate: biosynthesis and biological function. *J Histochem Cytochem*.  
765 2012 Dec;60(12):916–25.
- 766 11. Tello M, Jakimowicz P, Errey JC, Freel Meyers CL, Walsh CT, Buttner MJ, et al.  
767 Characterisation of Streptomyces spheroides NovW and revision of its functional  
768 assignment to a dTDP-6-deoxy-D-xylo-4-hexulose 3-epimerase. *Chem Commun (Camb)*.  
769 2006 Mar 14;(10):1079–81.
- 770 12. Polizzi SJ, Walsh RM, Peeples WB, Lim J-M, Wells L, Wood ZA. Human UDP- $\alpha$ -D-  
771 xylose synthase and Escherichia coli ArnA conserve a conformational shunt that controls  
772 whether xylose or 4-keto-xylose is produced. *Biochemistry*. 2012 Nov 6;51(44):8844–55.

- 773 13. Li Z, Mukherjee T, Bowler K, Namdari S, Snow Z, Prestridge S, et al. A four-gene operon  
774 in *Bacillus cereus* produces two rare spore-decorating sugars. *J Biol Chem*. 2017 May  
775 5;292(18):7636–50.
- 776 14. Hwang S, Aronov A, Bar-Peled M. The Biosynthesis of UDP-D-QuiNAc in *Bacillus cereus*  
777 ATCC 14579. *PLoS ONE*. 2015;10(7):e0133790.
- 778 15. Ohno S. *Evolution by Gene Duplication*. Springer Science & Business Media; 2013. 171 p.
- 779 16. Copley SD. Evolution of new enzymes by gene duplication and divergence. *FEBS J*. 2020  
780 Apr;287(7):1262–83.
- 781 17. Keinhörster D, George SE, Weidenmaier C, Wolz C. Function and regulation of  
782 *Staphylococcus aureus* wall teichoic acids and capsular polysaccharides. *Int J Med*  
783 *Microbiol*. 2019 Sep;309(6):151333.
- 784 18. Pfannkuch L, Hurwitz R, Traulsen J, Sigulla J, Poeschke M, Matzner L, et al. ADP heptose,  
785 a novel pathogen-associated molecular pattern identified in *Helicobacter pylori*. *FASEB J*.  
786 2019;33(8):9087–99.
- 787 19. Trachtenberg S. Mollicutes-wall-less bacteria with internal cytoskeletons. *J Struct Biol*.  
788 1998 Dec 15;124(2–3):244–56.
- 789 20. Khachane AN, Timmis KN, Martins dos Santos VAP. Dynamics of reductive genome  
790 evolution in mitochondria and obligate intracellular microbes. *Mol Biol Evol*. 2007  
791 Feb;24(2):449–56.
- 792 21. Amano K, Tamura A, Ohashi N, Urakami H, Kaya S, Fukushi K. Deficiency of  
793 peptidoglycan and lipopolysaccharide components in *Rickettsia tsutsugamushi*. *Infect*  
794 *Immun*. 1987 Sep;55(9):2290–2.
- 795 22. Rund S, Lindner B, Brade H, Holst O. Structural analysis of the lipopolysaccharide from  
796 *Chlamydia trachomatis* serotype L2. *J Biol Chem*. 1999 Jun 11;274(24):16819–24.
- 797 23. Peturova M, Vitiazeva V, Toman R. Structural features of the O-antigen of *Rickettsia typhi*,  
798 the etiological agent of endemic typhus. *Acta Virol*. 2015 Sep;59(3):228–33.
- 799 24. Theunissen C, Cnops L, Van Esbroeck M, Huits R, Bottieau E. Acute-phase diagnosis of  
800 murine and scrub typhus in Belgian travelers by polymerase chain reaction: a case report.  
801 *BMC Infect Dis*. 2017 13;17(1):273.
- 802 25. Tamura A, Ohashi N, Urakami H, Miyamura S. Classification of *Rickettsia tsutsugamushi*  
803 in a new genus, *Orientia* gen. nov., as *Orientia tsutsugamushi* comb. nov. *Int J Syst*  
804 *Bacteriol*. 1995 Jul;45(3):589–91.
- 805 26. Fuxelius H-H, Darby A, Min C-K, Cho N-H, Andersson SGE. The genomic and metabolic  
806 diversity of *Rickettsia*. *Res Microbiol*. 2007 Dec;158(10):745–53.

- 807 27. Jones C. Revised structures for the capsular polysaccharides from *Staphylococcus aureus*  
808 Types 5 and 8, components of novel glycoconjugate vaccines. *Carbohydr Res.* 2005 May  
809 2;340(6):1097–106.
- 810 28. Moissl-Eichinger C, Pausan M, Taffner J, Berg G, Bang C, Schmitz RA. Archaea Are  
811 Interactive Components of Complex Microbiomes. *Trends Microbiol.* 2018;26(1):70–85.
- 812 29. Lurie-Weinberger MN, Peeri M, Gophna U. Contribution of lateral gene transfer to the  
813 gene repertoire of a gut-adapted methanogen. *Genomics.* 2012 Jan;99(1):52–8.
- 814 30. Lukáčová M, Barák I, Kazár J. Role of structural variations of polysaccharide antigens in  
815 the pathogenicity of Gram-negative bacteria. *Clin Microbiol Infect.* 2008 Mar;14(3):200–6.
- 816 31. Hassler CS, Schoemann V, Nichols CM, Butler ECV, Boyd PW. Saccharides enhance iron  
817 bioavailability to Southern Ocean phytoplankton. *Proc Natl Acad Sci USA.* 2011 Jan  
818 18;108(3):1076–81.
- 819 32. Zhang Z, Chen Y, Wang R, Cai R, Fu Y, Jiao N. The Fate of Marine Bacterial  
820 Exopolysaccharide in Natural Marine Microbial Communities. *PLoS ONE.*  
821 2015;10(11):e0142690.
- 822 33. Qimron U, Marintcheva B, Tabor S, Richardson CC. Genomewide screens for *Escherichia*  
823 *coli* genes affecting growth of T7 bacteriophage. *Proc Natl Acad Sci USA.* 2006 Dec  
824 12;103(50):19039–44.
- 825 34. Morrison MJ, Imperiali B. The renaissance of bacillosamine and its derivatives: pathway  
826 characterization and implications in pathogenicity. *Biochemistry.* 2014 Feb 4;53(4):624–38.
- 827 35. Wacker M, Feldman MF, Callewaert N, Kowarik M, Clarke BR, Pohl NL, et al. Substrate  
828 specificity of bacterial oligosaccharyltransferase suggests a common transfer mechanism  
829 for the bacterial and eukaryotic systems. *Proc Natl Acad Sci USA.* 2006 May  
830 2;103(18):7088–93.
- 831 36. Kenyon JJ, Cunneen MM, Reeves PR. Genetics and evolution of *Yersinia*  
832 *pseudotuberculosis* O-specific polysaccharides: a novel pattern of O-antigen diversity.  
833 *FEMS Microbiol Rev.* 2017 01;41(2):200–17.
- 834 37. Skurnik M, Peippo A, Ervelä E. Characterization of the O-antigen gene clusters of *Yersinia*  
835 *pseudotuberculosis* and the cryptic O-antigen gene cluster of *Yersinia pestis* shows that the  
836 plague bacillus is most closely related to and has evolved from *Y. pseudotuberculosis*  
837 serotype O:1b. *Mol Microbiol.* 2000 Jul;37(2):316–30.
- 838 38. Xu Y, Brenning B, Clifford A, Vollmer D, Bearss J, Jones C, et al. Discovery of Novel  
839 Putative Inhibitors of UDP-GlcNAc 2-Epimerase as Potent Antibacterial Agents. *ACS Med*  
840 *Chem Lett.* 2013 Dec 12;4(12):1142–7.



841 39. Mariño K, Bones J, Kattla JJ, Rudd PM. A systematic approach to protein glycosylation  
842 analysis: a path through the maze. *Nat Chem Biol.* 2010 Oct;6(10):713–23.

843 40. Varki A. Biological roles of glycans. *Glycobiology.* 2017;27(1):3–49.

844

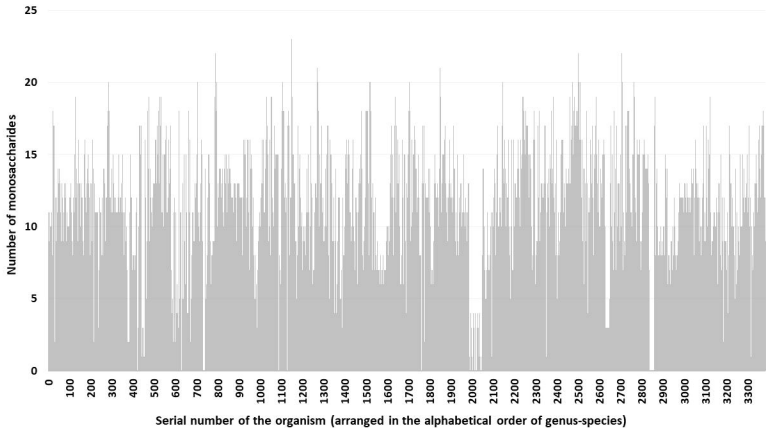

## Common

### Simple sugars

Glucose  
Galactose  
Mannose

### C2-N-acetyl derivatives

Glc2NAc  
Gal2NAc  
Man2NAc

### Uronic acid derivatives

GlcA  
GalA  
Glc2NAcA  
Gal2NAcA  
Man2NAcA

### Deoxy derivative

L-Rhamnose

## Less common

### Simple sugars

Xylose  
L-Galactose

### Furanose form

Galactofuranose

### Deoxy derivative

L-Fucose

### C4-Amino derivative

L-Ara4N

## Rare

### Simple sugar

L-Galactose

### Amino / N-Acetyl derivatives

|         |           |           |           |
|---------|-----------|-----------|-----------|
| Qui2NAc | Fuc2NAc   | Per       | L-Qui2NAc |
| Qui3NAc | Fuc3NAc   | Per4Ac    | L-Fuc2NAc |
| Qui4NAc | Fuc4NAc   |           | L-Rha2NAc |
| Qui4NFo | Bac2Ac4Ac | L-Ara4NFo |           |

### Uronic acid derivatives

ManA      Man2NAc3NAcA

### Deoxy derivatives

|          |         |              |                  |
|----------|---------|--------------|------------------|
| Rhamnose | Cillose | Fucofuranose | 6-Deoxytalose    |
| Fucose   | Cereose | Yelosamine   | 6-Deoxygulose    |
|          |         |              | 6-Deoxy-L-talose |

### Dideoxy derivatives

Paratose    Abequose    Tyvelose      L-colitose    L-Ascarylose

### Heptoses

|                                     |                                     |
|-------------------------------------|-------------------------------------|
| <i>L-glycero-β-D-manno</i> -Heptose | <i>D-glycero-α-D-manno</i> -Heptose |
| 6-Deoxy- <i>α-D-manno</i> -heptose  | 6-Deoxy- <i>α-D-altro</i> -heptose  |

### 9-Carbon sugars

Neu5Ac    Leg5Ac7Ac    L-Pse5Ac7Ac

## Prevalence of monosaccharides

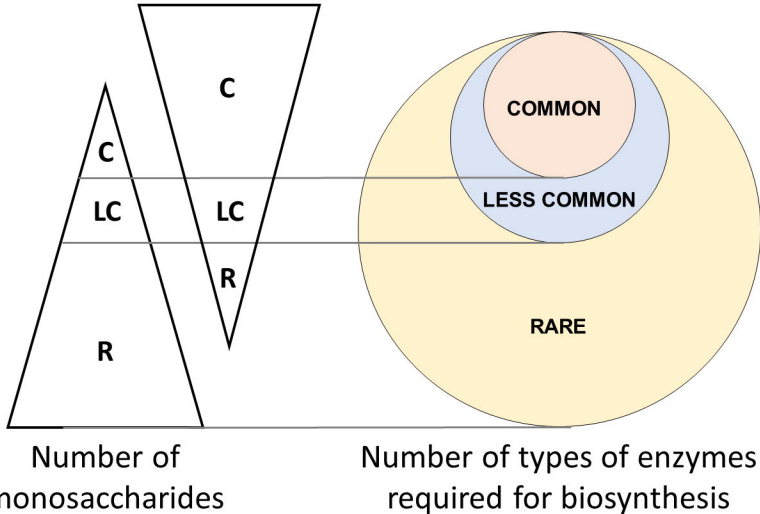

Glutamine amidotransferases  
Nucleotidyltransferases  
Cupin superfamily  
SDR superfamily  
 $\alpha$ -D-phosphohexomutase superfamily  
Non-hydrolysing C2-epimerases  
N-acetyltransferases (L $\beta$ H-domain containing)  
Type II/III phosphomannose isomerase

PLP-dependent enzymes  
UDP-galactose mutase family

Deaminases  
N-formyltransferases  
N-acetyltransferases (GNAT family)  
Kinase  
SAM-dependent methyltransferases  
Hydrolases  
PEP-utilizing synthetases  
Hydrolysing C2-epimerases  
HAD superfamily  
Sedoheptulose 7-phosphate isomerases  
Gfo/Idh/MocA family

Types of enzymes

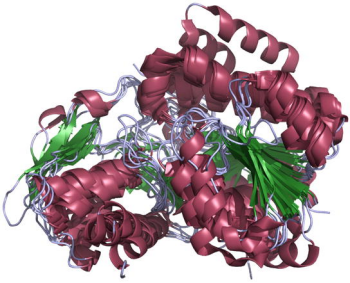

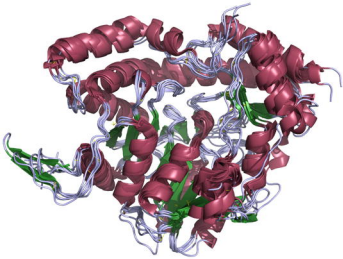



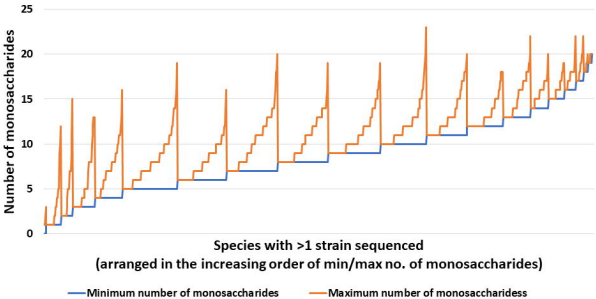

Number of monosaccharides

Species with >1 strain sequenced  
(arranged in the increasing order of min/max no. of monosaccharides)

— Minimum number of monosaccharides

— Maximum number of monosaccharides

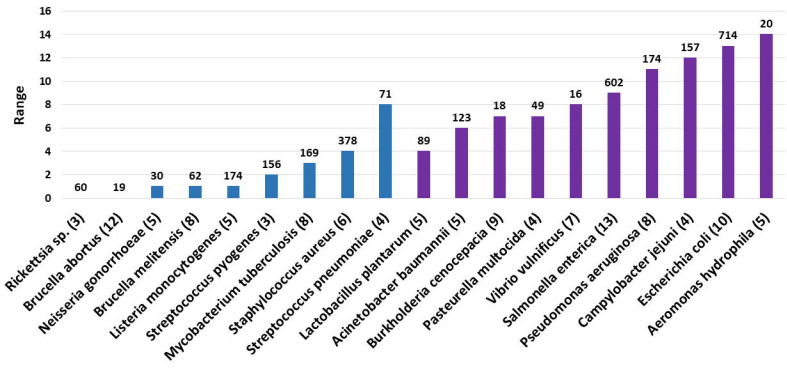

Source: https://www.biorxiv.org/content/10.1101/2020.01.15.908491v3.full.pdf
